# Supplementary material
Source: PubMed Central journal article supplement (PMC4419205)

# Supplemental Fig. 1

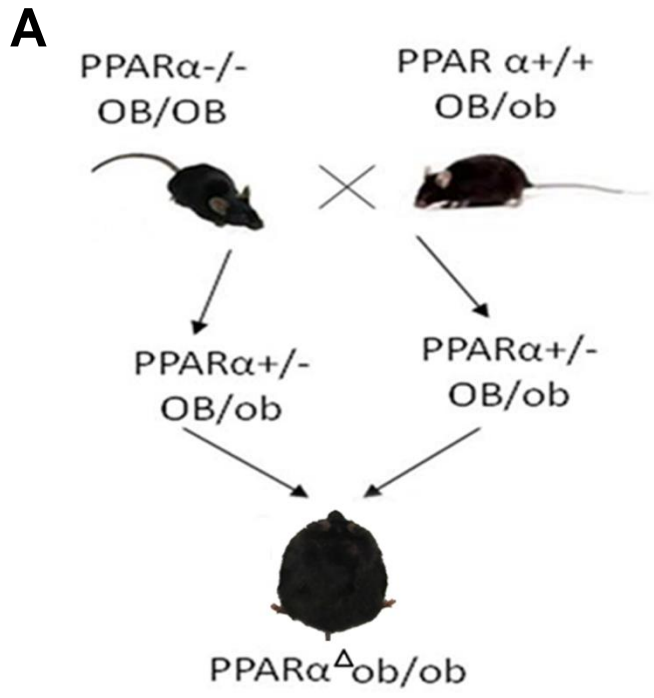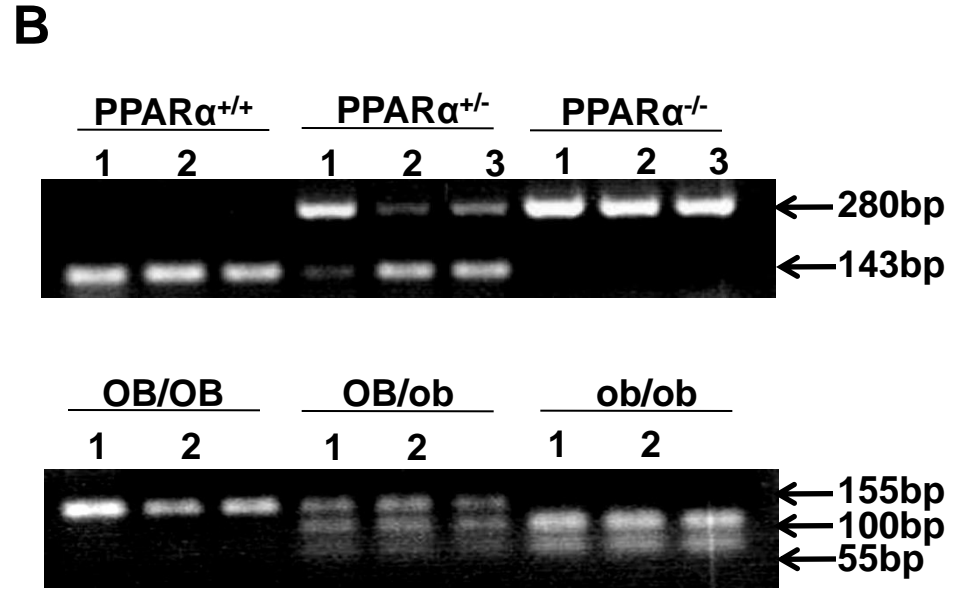

Supplement: mmc1.pdf [file mmc1.pdf]

**Supplemental Fig. 2**

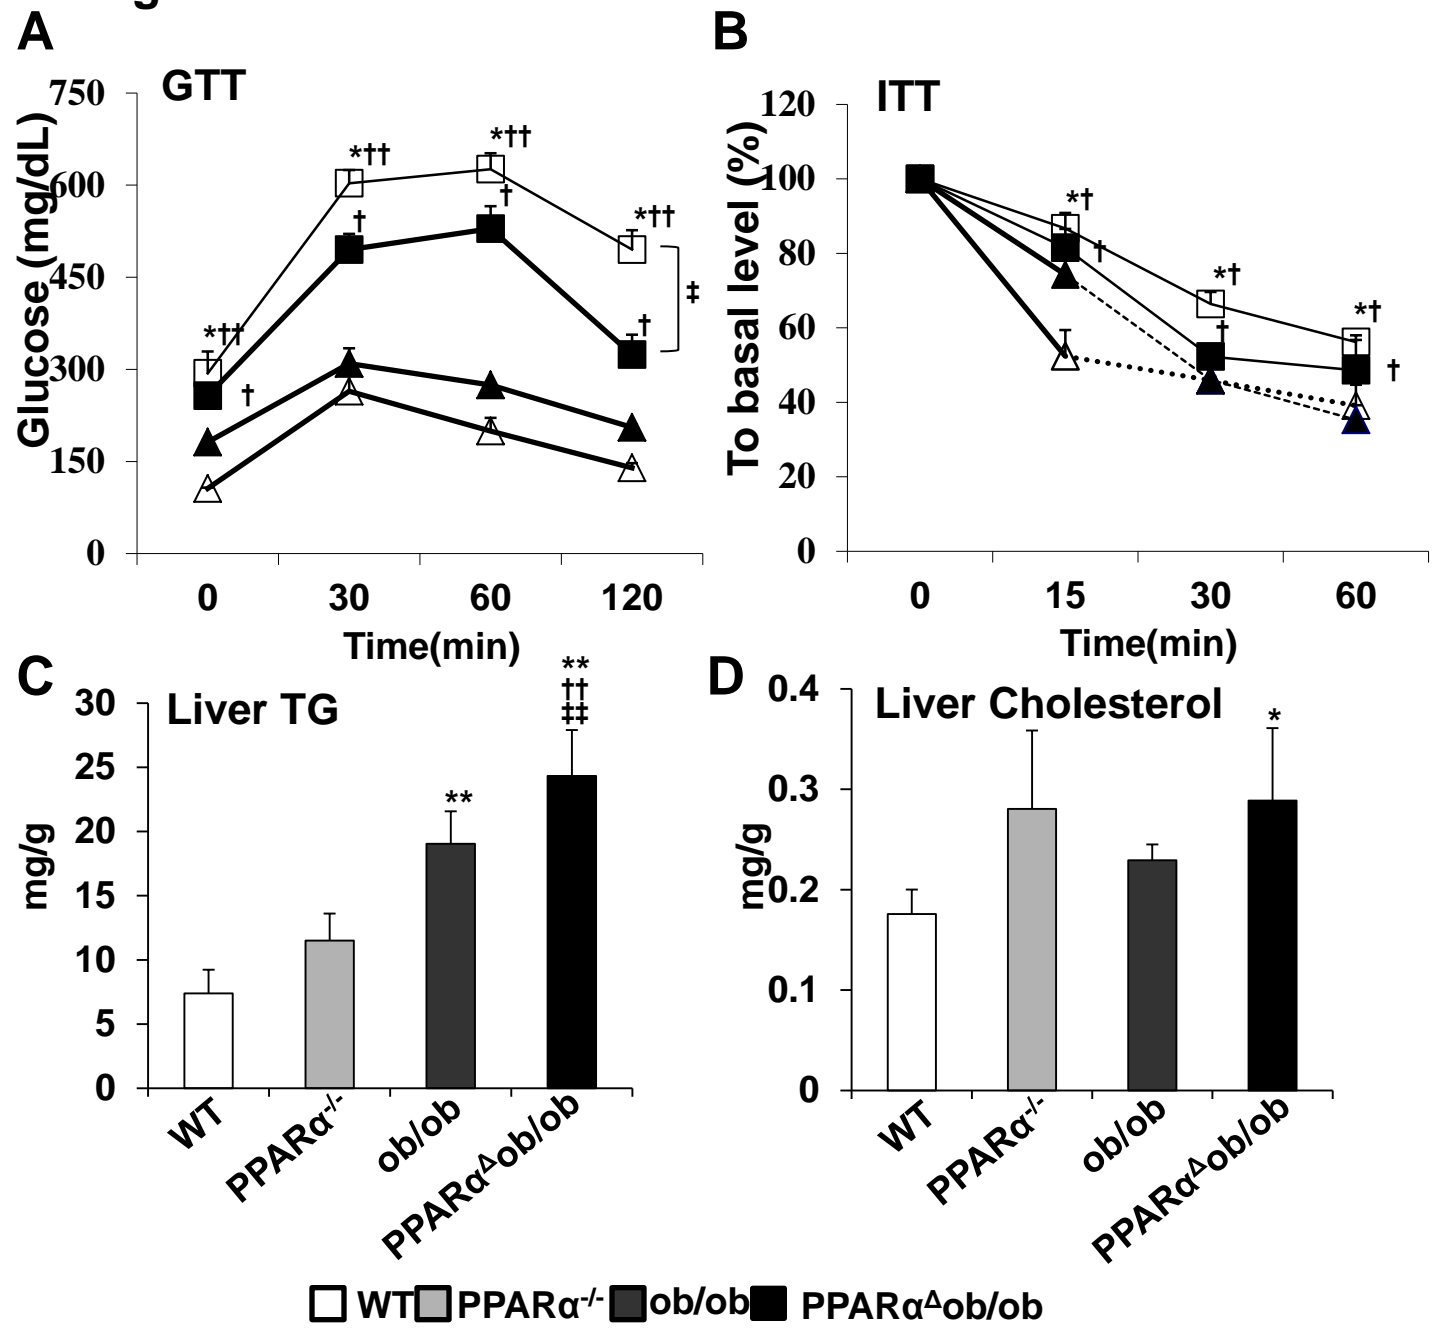

Supplement: mmc2.pdf [file mmc2.pdf]

# Supplemental Fig. 3

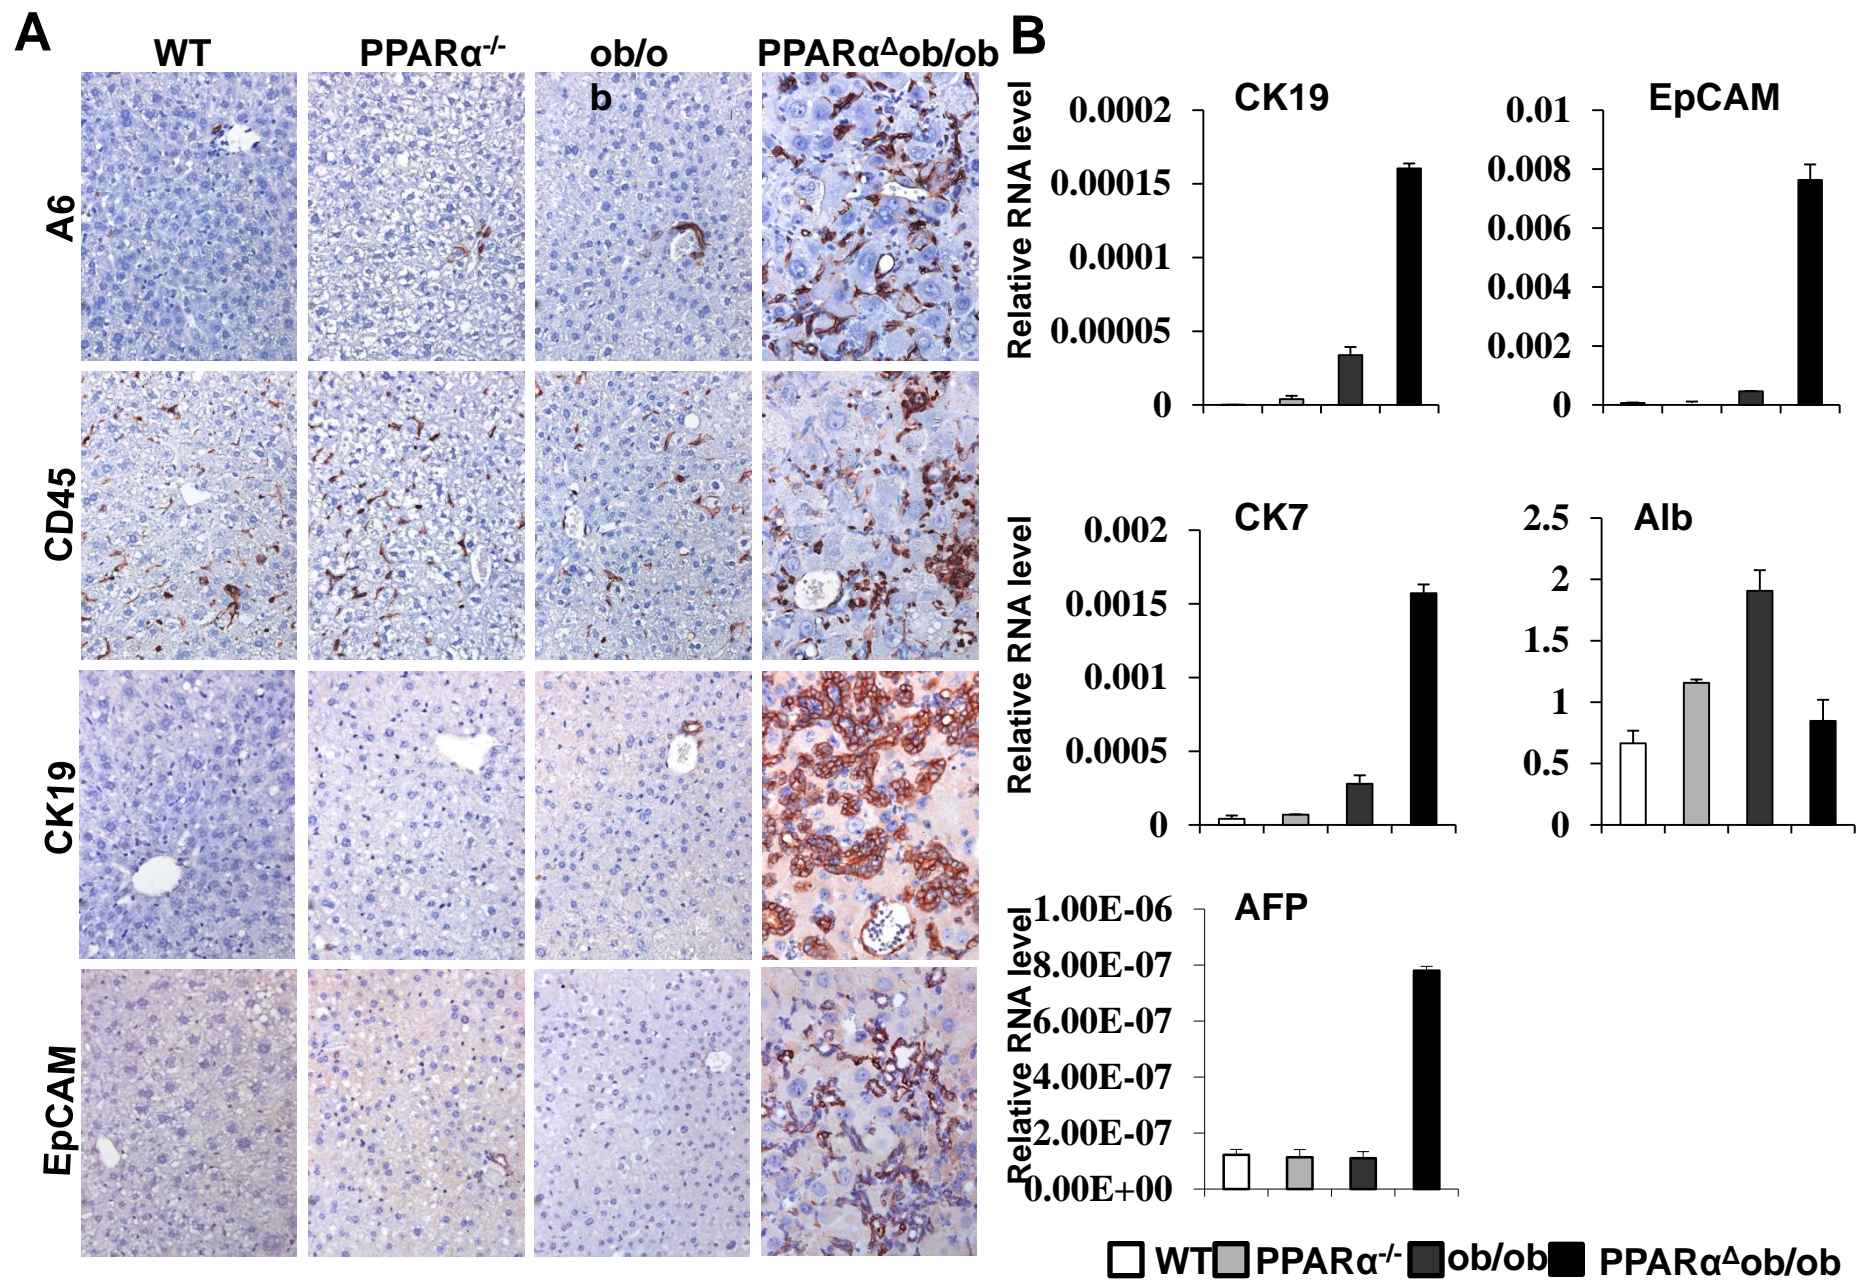

Supplement: mmc3.pdf [file mmc3.pdf]
